# Supplementary material for: HvGSK1.1 Controls Salt Tolerance and Yield through the Brassinosteroid Signaling Pathway in Barley
Source: MDPI journal article supplement (doi:10.3390/ijms25020998), 2024-01-13
Supplement: s1 [file s1]

Supplementary Materials:

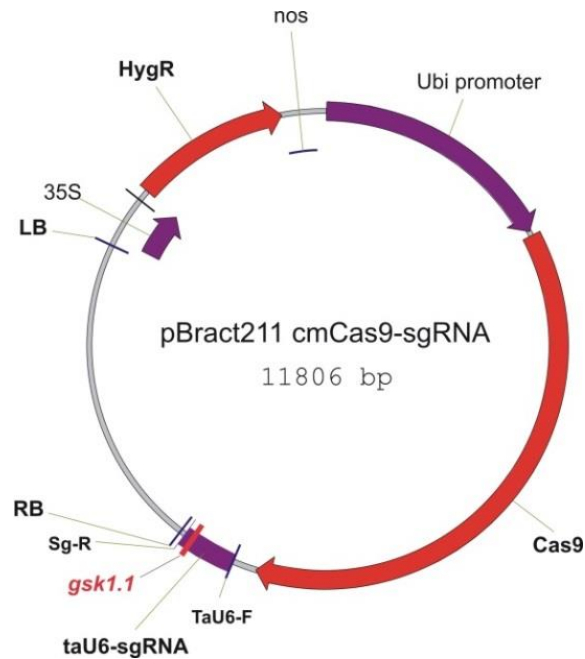

**Figure S1.** Scheme of the destination vector pBract211cmCas9-sgRNA. The vector pBract211cmCas9-sgRNA contains i) a synthetic Cas9 gene (based on the native sequence of *Streptococcus pyogenes* with codon usage optimized for expression in monocots) driven by the maize ubiquitin promoter; ii) an sgRNA cassette consisting of the wheat U6 RNA promoter, *gsk1.1* gRNA, and transcription termination signal, and amplification primers TaU6-F and Sg-R are indicated; iii) a hygromycin resistance gene (*hptII*) as a selection marker for the regenerated plants.

**Table S1.** List of the PCR primers and oligonucleotides that were used in this study.

| Purpose                                                                                                                                   | Symbol           | Sequence                                                     | Oligos/Amplicon Length (bp) |
|-------------------------------------------------------------------------------------------------------------------------------------------|------------------|--------------------------------------------------------------|-----------------------------|
| oligos for cloning <i>HvGSK1.1</i> sgRNA<br>HORVU.MOREX.r3.3HG02526<br>10                                                                 | oligo1_gsk1_1-Fw | 5'- <i>ctg</i> GCGCATGGTCTGTAGCTCA-3'                        | 23                          |
|                                                                                                                                           | oligo1_gsk1_1-Re | 5'- <i>aac</i> TGAGCTACAGACCATGCGC-3'                        | 23                          |
| PCR primers flanking the <i>hptII</i> gene                                                                                                | hpt-F-205        | 5'-GACGGCAATTTTCGATGATG-3'                                   | 205                         |
|                                                                                                                                           | hpt-R-205        | 5'-CCGGTCGGCATCTACTCTAT-3'                                   |                             |
| PCR primers flanking the cloning site in the pBract211_cmCas9-sgRNA-gsk1.1 vector                                                         | TaU6 – F         | 5'-GACCAAGCCCGTTATTCTGA-3'                                   | 375                         |
|                                                                                                                                           | Oligo gsk1.1- R  | 5'-AAACTGAGCTACAGACCATGCGC-3'                                |                             |
| PCR primers flanking the TaU6sgRNA cassette                                                                                               | TaU6 – F         | 5'-GACCAAGCCCGTTATTCTGA-3'                                   | 465 – 467                   |
|                                                                                                                                           | Sg – R           | 5'- AAAAAAAGCACCGACTCGGTGCCAC-3'                             |                             |
| PCR primers flanking the <i>HvGSK1.1</i> target site sequence (HORVU.MOREX.r3.3HG0252610)                                                 | gsk1.1_Ontarg_L  | 5'-CCTGTGGCAAACCTCCAATGC-3'                                  | 367                         |
|                                                                                                                                           | gsk1.1_Ontarg_R  | 5'-CCTTCAGGACAAGCGCTACA-3'                                   |                             |
| PCR primers flanking the <i>HvGSK1.1</i> target site sequence (HORVU.MOREX.r3.3HG0252610) extended by Illumina platform-specific adapters | ADAPTgsk1.1F     | 5'-TCGTCGGCAGCGTCAGATGTGTATAAGAGACAGGGGTGTA CCTGGAGCTTGTG-3' | 359                         |
|                                                                                                                                           | ADAPTgsk1.1R     | 5'-GTCTCGTGGGCTCGGAGATGTGTATAAGAGACAGGCATGCGCTGGTTCATCTTG-3' |                             |
| PCR primers flanking the Off-targets HORVU2Hr1G029120                                                                                     | Off_ 9120F       | 5'-TCGTCGGCAGCGTCGATCAATGTGCTCGGCGTTG-3'                     | 160                         |
|                                                                                                                                           | Off_ 9120R       | 5'-GTCTCGTGGGCTCGGAACAACCTCACCTCCGGCTT-3'                    |                             |

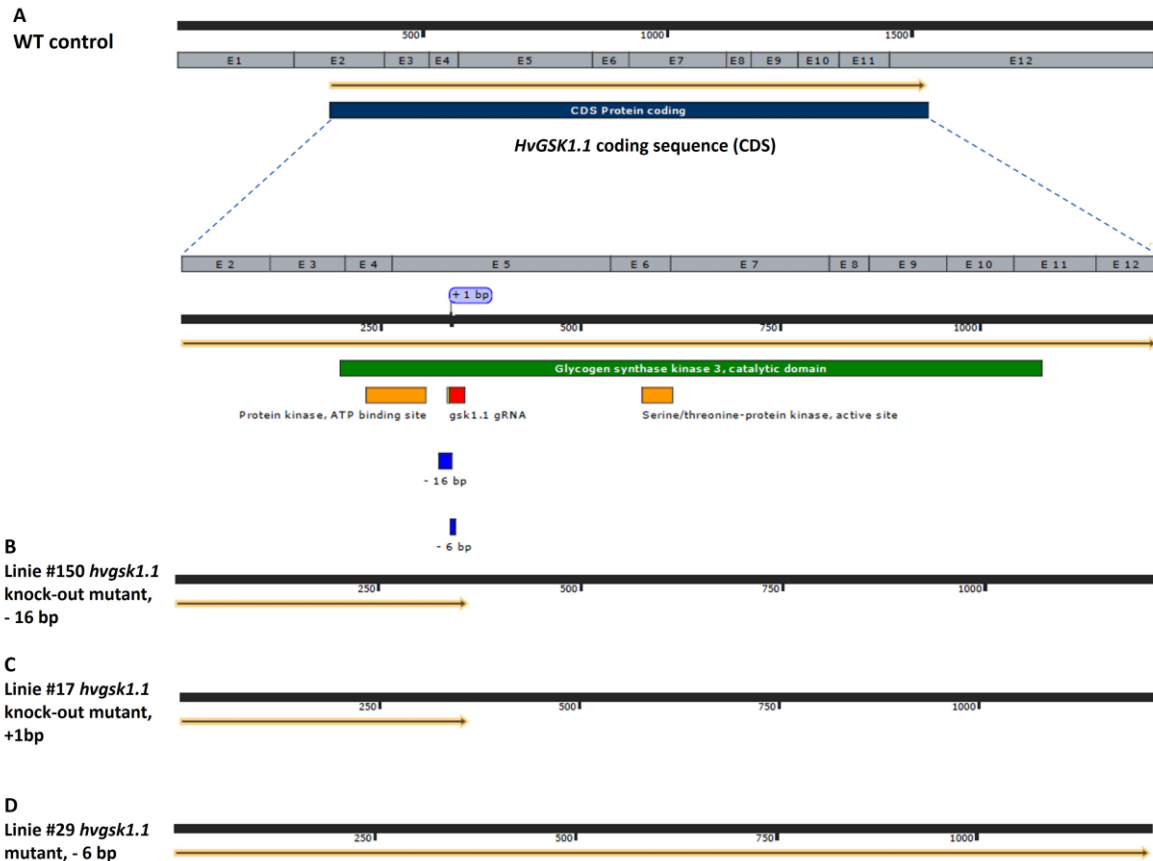

**Figure S2.** Diagram showing the structure of the *HvGSK1.1* transcript, CDS sequence, and GSK1.1 protein length WT (**A**), truncated (**B**, **C**), and with the expected deletion of two amino acids (**D**).

**A** Structure of *HvGSK1.1* transcript, E1-E12 exons, CDS (dark blue) and ORF (orange arrow), GSK3 catalytic domain (green color), protein kinase, ATP binding site, serine/threonine, protein kinase active site (orange color), gsk1.1 gRNA (red), PAM (yellow), mutations in the target site: deletion of 16 nt (-16 bp), insertion of 1 nt (+1bp), and deletion of 6 nt (-6 bp) (highlighted in blue).

**B** Predicted change in HvGSK1.1 protein length in the #150 knockout mutant line.

**C** Predicted change in HvGSK1.1 protein length in the #17 knockout mutant line.

**D** Predicted changes in HvGSK1.1 protein length in the mutant with two amino acid deletions in line #29.
